# Supplementary material for: Turn-on fluorescent nanoprobe for ATP detection based on DNA-templated silver nanoclusters
Source: Royal Society of Chemistry journal article supplement (doi:10.1039/d3ra07077h), 2024-01-01
Supplement: d3ra07077h1.pdf [file d3ra07077h1.pdf]

## Electronic Supplementary Information

### **A turn-on fluorescent nanoprobe for ATP detection based on DNA- templated silver nanoclusters**

Yuxia Li, Zeting Meng, Yating Liu, Baozhu Zhang\*

Department of Chemistry and Chemical Engineering, Jinzhong University, Yuci 030619, P. R. China

---

\*Corresponding author.

E-mail address: [zhangbaozhu518@126.com](mailto:zhangbaozhu518@126.com)

**Table S1** Names and sequences of the oligonucleotides.

| Oligonucleotids | Sequences (5' - 3')                                            |
|-----------------|----------------------------------------------------------------|
| C-DNA           | CCCTAACTCCCC                                                   |
| (L)BT3A3        | AACCTGGGGGAGTATTGCGGAGGAAGGTAAACCCTAACTCCCC                    |
| BT3A3(R)        | CCCTTAATCCCCTTTAACCTGGGGGAGTATTGCGGAGGAAGGT                    |
| BT3A3           | CCCTTAATCCCCTTTAACCTGGGGGAGTATTGCGGAGGAAGGT<br>AAACCCTAACTCCCC |

**Table S2** Comparison of different methods for the detection of ATP.

| Detection methods                                            | LOD         | Linear range  | References |
|--------------------------------------------------------------|-------------|---------------|------------|
| Fluorescence DNA-Cu/Ag NCs                                   | 7.0 $\mu$ M | 2-18 mM       | 36         |
| DNA-Ag NC fluorescence light-up system                       | 0.44 mM     | 0-4 mM        | 35         |
| Fluorescence-based core-shell Ag@SiO <sub>2</sub> nanoflares | 8 $\mu$ M   | 0-500 $\mu$ M | 42         |
| Light-up DNA-scaffolded silver nanoclusters                  | 0.81 mM     | 1-6 mM        | 43         |
| Fluorescence DNA-Ag NCs                                      | 3.0 $\mu$ M | 6-24 mM       | this work  |

**Table S3** The lifetimes of (L)BT3A3-Ag NCs in the absence and presence of ATP.

| Samples                  | [ATP](mM) | $\tau$ (ns) | $\chi^2$ |
|--------------------------|-----------|-------------|----------|
| (L)BT3A3-Ag<br>NCs       | 0         | 3.32        | 1.1977   |
|                          | 5         | 3.34        | 1.1178   |
| (L)BT3A3-Ag<br>NCs + ATP | 10        | 3.29        | 1.1090   |
|                          | 15        | 3.23        | 1.1708   |
|                          | 20        | 3.11        | 1.0973   |

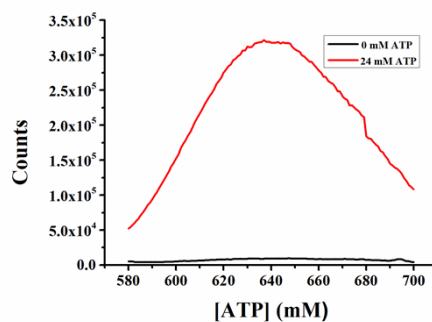**Fig. S1** Feasibility for the detection of ATP.

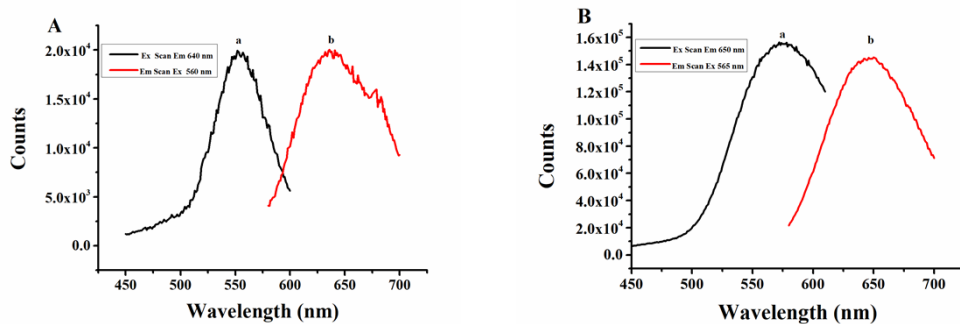

**Fig. S2** (A) The excitation (a) and emission (b) spectra of BT3A3-Ag NCs. (B) The excitation (a) and emission (b) spectra of BT3A3(R)-Ag NCs.

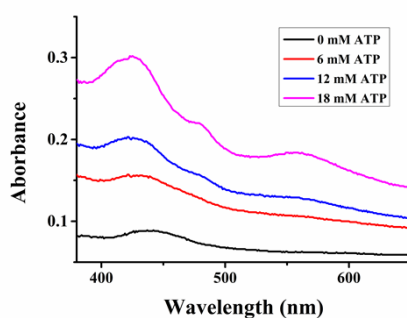

**Fig. S3** UV-Vis absorption spectra of (L)BT3A3-Ag NCs in the absence and presence of ATP

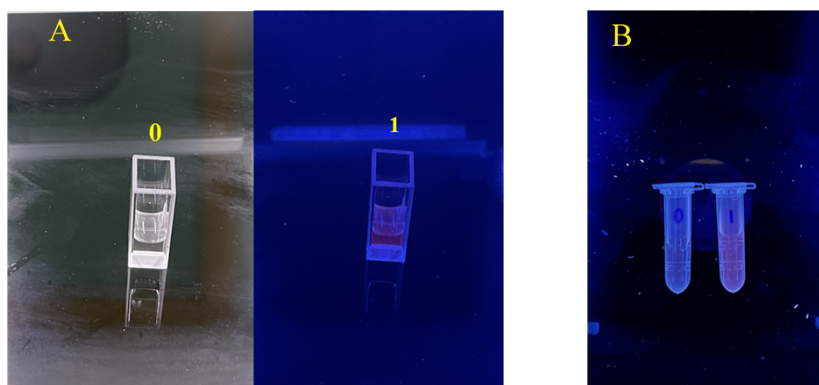

**Fig. S4** (A) The images of (L)BT3A3-Ag NCs before (0) and under (1) illumination of UV light ( $\lambda_{\max} = 365$  nm). (B) The image of (L)BT3A3-Ag NCs before (0) and after (1) the addition of 10 mM ATP under illumination of UV light ( $\lambda_{\max} = 365$  nm).

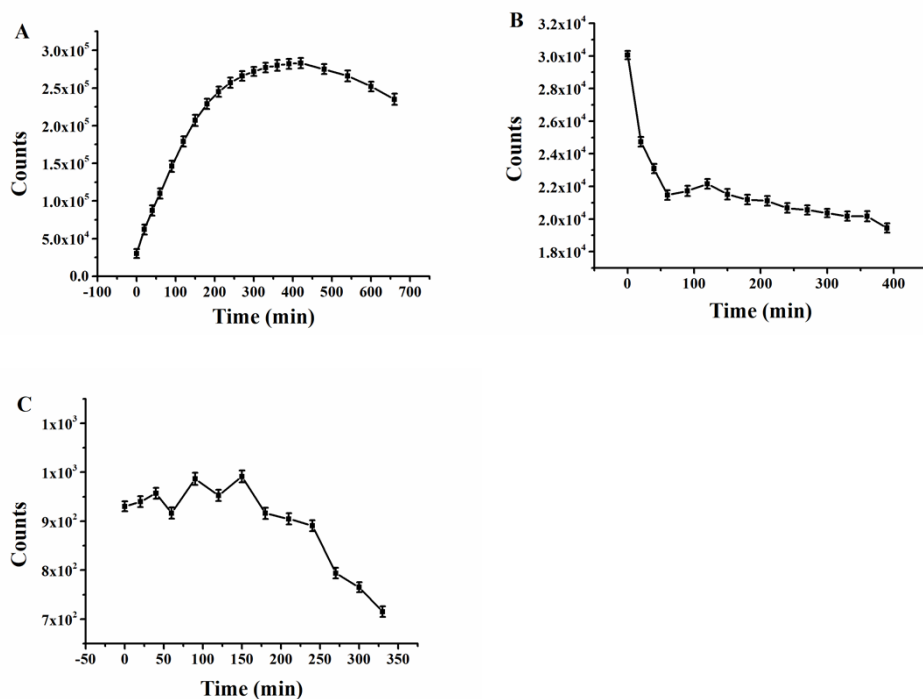

**Fig. S5** The change of fluorescence intensity of (L)BT3A3-Ag NCs (A), BT3A3-Ag NCs (B), and BT3A3(R)-Ag NCs(C), against the increasing time. Error bars represent the standard deviation of three independent measurements.  $c(\text{DNA}) = 3.0 \mu\text{M}$ .

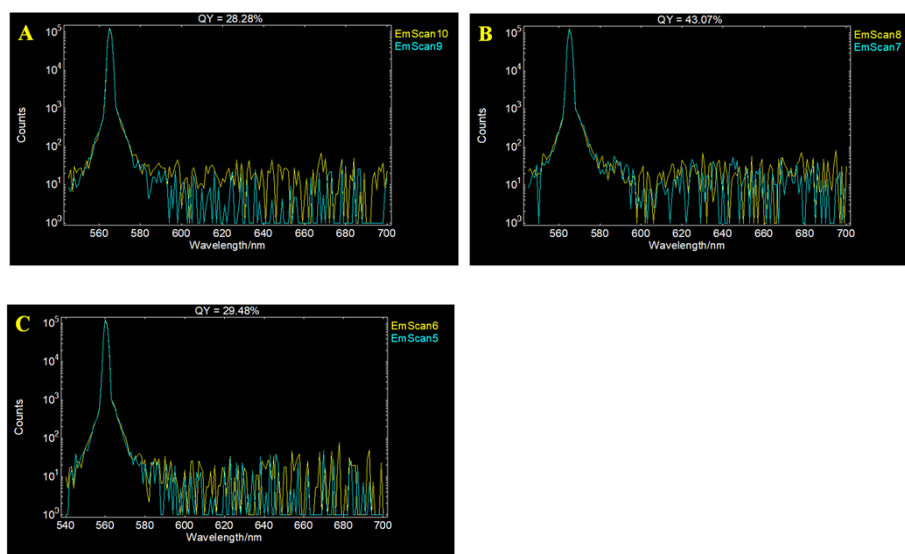

**Fig. S6** The quantum yield (QY) of (L)BT3A3-AgNCs ( $\lambda_{\text{ex}} = 565 \text{ nm}$ , integrated wavelength range:545-700 nm) (A), BT3A3-AgNCs ( $\lambda_{\text{ex}} = 560 \text{ nm}$ , integrated wavelength range:540-700 nm) (B), and BT3A3(R)-AgNCs ( $\lambda_{\text{ex}} = 565 \text{ nm}$ , integrated wavelength range:545-700 nm) (C) probes.

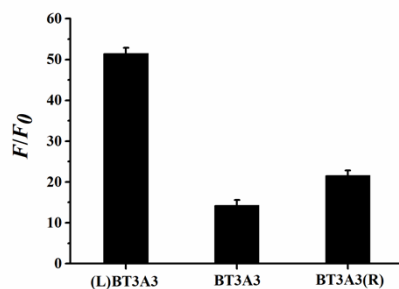

**Fig. S7** The relative fluorescence intensity ( $F/F_0$ ) of different DNA-AgNCs.  $F_0$  and  $F$  are the emission intensity of the DNA-Ag NCs before and after the addition of 21 mM ATP, respectively. The error bars represent the standard deviation of three independent measurements.

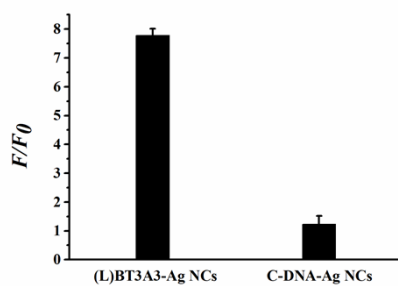

**Fig. S8** The relative fluorescence intensity ( $F/F_0$ ) of different DNA-AgNCs.  $F_0$  and  $F$  are the emission intensity of the DNA-Ag NCs before and after the addition of 10 mM ATP, respectively. The error bars represent the standard deviation of three independent measurements.

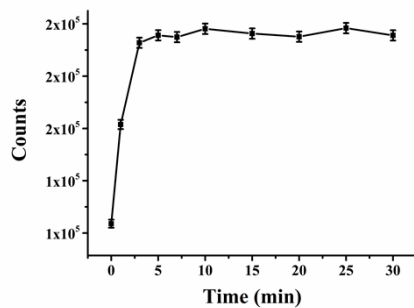

**Fig. S9** The fluorescence intensity of (L)BT3A3-AgNCs with 15 mM ATP against the reaction time.

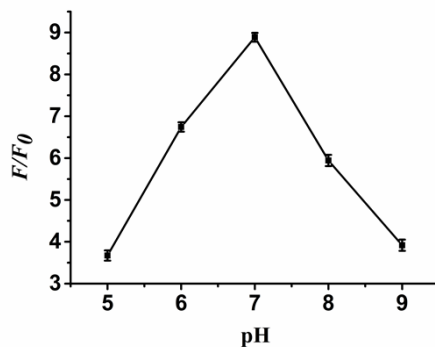

**Fig. S10** Relative fluorescence intensity ( $F/F_0$ ) of (L)BT3T3-Ag NCs at different pH values.  $F_0$  and  $F$  are the maximum emission intensity of (L)BT3T3-Ag NCs without and with 12 mM ATP, respectively. The error bars represent the standard deviation of three independent measurements.

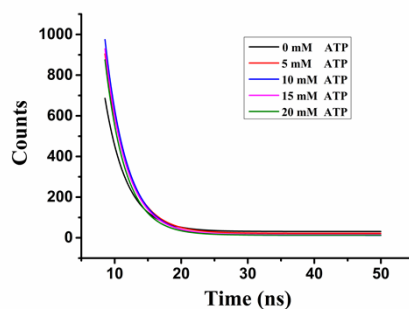

**Fig. S11** The fluorescence lifetimes of (L)BT3A3-Ag NCs (excitation at 405 nm and emission at 635 nm) in the absence and presence of ATP.

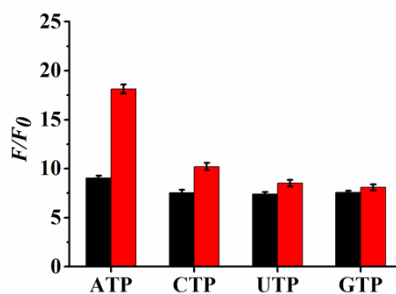

**Fig. S12** Selectivity of the ATP detection system. The relative fluorescent intensity ( $F/F_0$ ) of (L)BT3A3-Ag NCs in the presence of ATP (10 mM, black bars) and coexistence (red bars) of ATP (10 mM) and ATP, CTP, UTP, and GTP (5 mM).

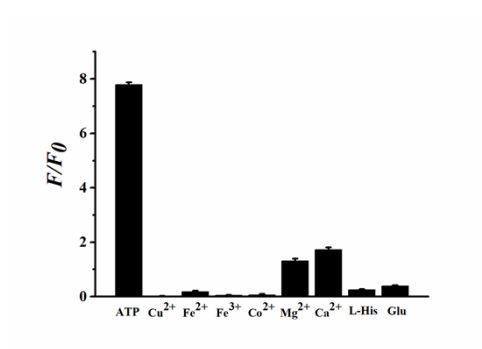

**Fig. S13** Selectivity of the ATP detection system. The concentrations of ATP,  $\text{Cu}^{2+}$ ,  $\text{Fe}^{2+}$ ,  $\text{Fe}^{3+}$ ,  $\text{Co}^{2+}$ ,  $\text{Mg}^{2+}$ ,  $\text{Ca}^{2+}$ , Glucose (Glu) and L-Histidine (L-His) are 10 mM, respectively. Error bars represent the standard deviation of three repetitive experiments.
